# Supplementary material for: Imidazolate bridged Cu(ii)–Cu(ii) and Cu(ii)–Zn(ii) complexes of a terpyridinophane azamacrocycle: a solution and solid state study
Source: Royal Society of Chemistry journal article supplement (doi:10.1039/b708186c), 2007-01-01
Supplement: b708186c.pdf [file b708186c.pdf]

## Supporting Material

### Imidazolate Bridged Cu(II)-Cu(II) and Cu(II)-Zn(II) Complexes of a Terpyridinophane Azamacrocycle. A Solution and Solid State Study

Begoña Verdejo, Salvador Blasco, Enrique García-España, Francisco Lloret, Pablo Gaviña, Conxa Soriano, Sergio Tatay, Hermas R. Jiménez, Antonio Doménech and Julio Latorre

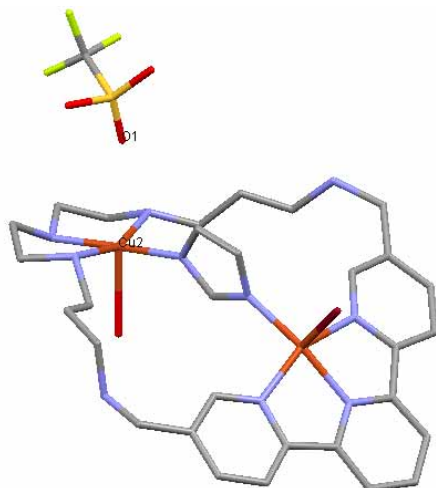

Fig S1.-Draw of the Coordination Site Showing the Long-Range Interaction Cu(2)-O(1)

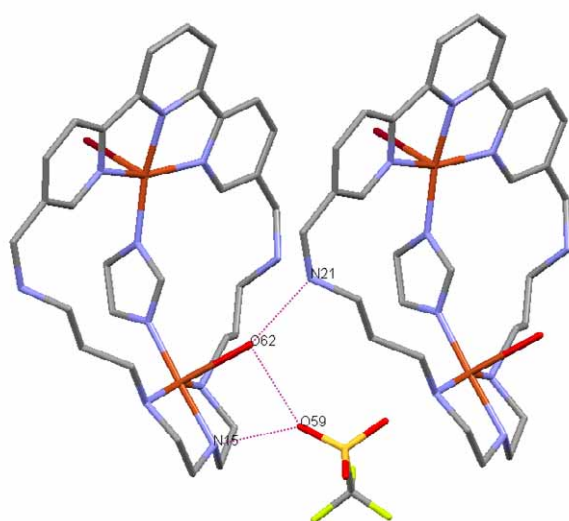

**Fig S2.** Repetitive motif detail interconnecting diferent subunits that conform the chain.

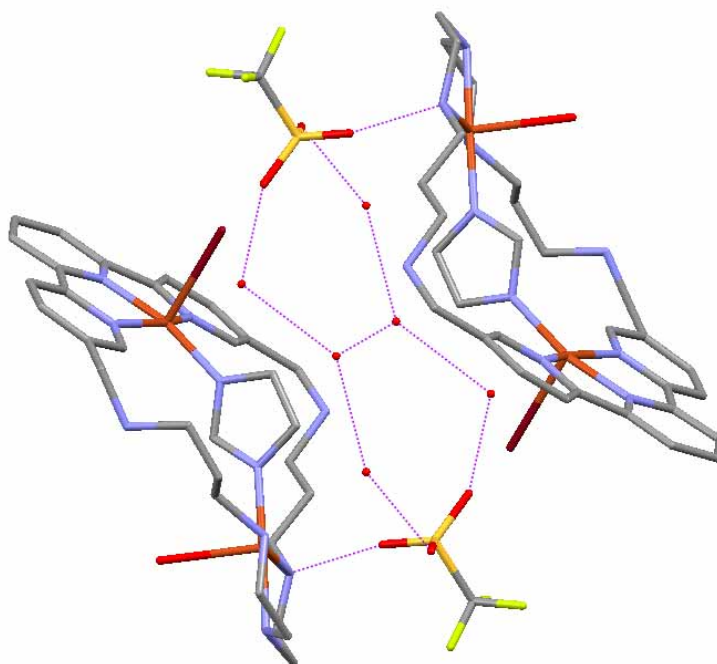

**Fig S3.** Repetitive motif that connect opposite chain subunits.

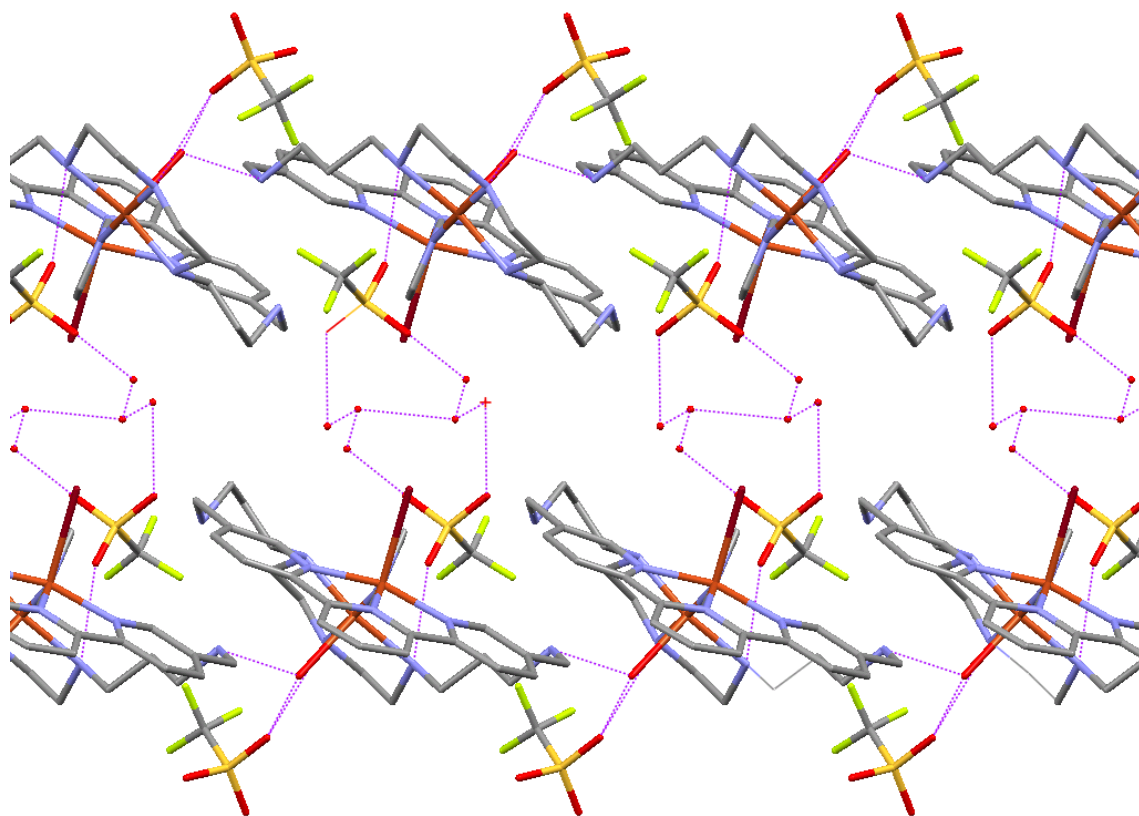

Fig S4. Crystal packing detail along c axis.

**Emf Measurements.** The potentiometric titrations were carried out at  $298.1 \pm 0.1$  K using  $\text{NaClO}_4$  0.15 M as supporting electrolyte. The experimental procedure (burette, potentiometer, cell, stirrer, microcomputer, etc.) has been fully described elsewhere.<sup>1</sup> The acquisition of the emf data was performed with the computer program PASAT.<sup>2</sup> The reference electrode was an Ag/AgCl electrode in saturated KCl solution. The glass electrode was calibrated as a hydrogen-ion concentration probe by titration of previously standardized amounts of HCl with  $\text{CO}_2$ -free NaOH solutions and the equivalent point determined by the Gran's method,<sup>3</sup> which gives the standard potential,  $E^\circ$ , and the ionic product of water ( $\text{pK}_w = 13.73(1)$ ).

The computer program HYPERQUAD was used to calculate the protonation and stability constants.<sup>4</sup> The pH range investigated was 2.5-11.0 and the concentration of the metal ions and of the ligands ranged from  $1 \times 10^{-3}$  to  $5 \times 10^{-3}$  M with M:L molar ratios varying from 2:1 to 1:2. For the ternary systems, aqueous solutions at acidic pH containing M:L in 2:1 molar ratios and different amounts of imidazole were titrated with NaOH solutions. In the treatment of the ternary systems the protonation constants of L and the stability constants for the formation of  $\text{Cu}^{2+}$ -L and  $\text{Zn}^{2+}$ -L complexes were taken from ref. 5 and those for  $\text{Cu}^{2+}$ -HIm and  $\text{Zn}^{2+}$ -HIm from the literature.<sup>6</sup> Introducing these constants as fixed parameters, the constants for the ternary  $\text{Cu}^{2+}$ -L-HIm or  $\text{Zn}^{2+}$ -L-HIm were then calculated. Furthermore, in order to check the consistency of the model, we have then fitted conjointly the titrations of the binary systems  $\text{Cu}^{2+}$ -L or  $\text{Zn}^{2+}$ -L and those of the ternary systems  $\text{Cu}^{2+}$ -L-HIm or  $\text{Zn}^{2+}$ -L-HIm, leaving as parameters to be refined all the constants for the  $\text{Cu}^{2+}$ -L or  $\text{Zn}^{2+}$ -L binary complexes and for the  $\text{Cu}^{2+}$ -L-HIm or  $\text{Zn}^{2+}$ -L-HIm mixed complexes. The model systems obtained were the same in both fittings and the differences between the values of the constants obtained fell within the limits of the standard deviations.

For the quaternary  $\text{Cu}^{2+}$ - $\text{Zn}^{2+}$ -L-HIm system, solutions containing  $\text{Cu}^{2+}$ ,  $\text{Zn}^{2+}$  and L in equimolar amounts and different amounts of imidazole were titrated with NaOH. In this case, apart from the constants of the binary  $\text{Cu}^{2+}$ -L,  $\text{Zn}^{2+}$ -L,  $\text{Cu}^{2+}$ -HIm and  $\text{Zn}^{2+}$ -HIm, the values of the constants previously determined for the ternary systems  $\text{Cu}^{2+}$ - $\text{Zn}^{2+}$ -L,  $\text{Cu}^{2+}$ -L-HIm and  $\text{Zn}^{2+}$ -L-HIm were introduced as fixed parameters in the fitting and the constants for the quaternary systems refined. Similarly to the procedure used for the ternary system, in a next step all titrations corresponding to the ternary and quaternary systems were fitted simultaneously leaving as parameters to be refined all the constants of the ternary and quaternary systems. Again, in this case both procedures gave reproducible chemical models and values of the constants. However, when more than one model could fit the experimental data, the most reliable chemical model was chosen by performing F tests at the 0.05 confidence level.<sup>7,8</sup>

**SOD Activity.** SOD-like activity was determined by using the nitro blue tetrazolium (NBT) reduction method by the superoxide radical.<sup>9,10</sup> The assay was carried out in an HEPES buffer 50 mM at pH = 7.8 and at room temperature. The kinetics of the NBT reduction to monoformazan (MF) was recorded by reading the absorbance change at 560 nm with the time. Several concentrations of every compound were prepared in TRIS buffer at pH = 7.8. A reaction mixture ca. 50  $\mu\text{M}$  in NBT and 175  $\mu\text{M}$  in xanthine in HEPES buffer was prepared. 800  $\mu\text{L}$  of the reaction mixture plus 100  $\mu\text{L}$  of the compound in TRIS buffer were added to 1 mL cuvette. The reaction starts when 100  $\mu\text{L}$  of a solution of xanthine oxidase was added. The xanthine oxidase concentration was optimized to find the appropriate amount that causes the linear absorbance variance during the reading time (2 min). The nonlinear initial induction period is rejected if it exists. The inhibition of the NBT reduction was computed<sup>11</sup> as  $(S_0 - S)/S_0$ , where  $S_0$  and  $S$  are the slopes (dA/dt) of the blank (uninhibited) and of the compound, respectively. The  $\text{IC}_{50}$  values were either read or interpolated from the inhibition vs. concentration plots.<sup>12</sup>

1 E. García-España, M. J. Ballester, F. Lloret, J. M. Moratal, J. Faus and A. Bianchi. *J. Chem. Soc., Dalton Trans.* 1988, 101.

2 M. Fontanelli and M. Micheloni, *Proceedings of the 1 Spanish-Italian Congress on Thermodynamics of Metal Complexes*, Peñíscola, Castellón, 1990. Program for the automatic control of the microburette and the acquisition of the electromotive force readings.

3 (a) G. Gran, *Analyst (London)* 1952, **77**, 661. (b) F. J. Rossotti and H. Rossotti, *J. Chem. Educ.*, 1965, **42**, 375.

4 P. Gans, A. Sabatini and A. Vacca, *Talanta*, 1996, **43**, 1739.

5 R. M. Smith and A. E. Martell, *NIST Stability Constants Database, version 4.0*. National Institute of Standards and Technology. Washington D.C. 1997.

6 W. C. Hamilton, *Statistics in Physical chemistry*; the Ronald Press Co., New York, 1964.

8 L. Bologni, A. Sabatini and A. Vacca, *Inorg. Chim. Acta*, 1983, **69**, 71.

9 L. W. Oberley and D. R. Spitz, *Handbook of methods of Oxygen Radicals Research*. Ed. R. A. Grenwald, CRC Press: Boca Raton, 1986, p 218.

10 C. Beauchamp and I. Fridovich, *Anal. Biochem.*, 1971, **44**, 276.

11 J. Y. Zhou and P. Prognon, *J. Pharm. Biomed. Anal.*, 2006, **40**, 1143.

12 R. Cejudo-Marin, G. Alzuet, S. Ferrer, J. Borrás, A. Castiñeiras, E. Monzani and L. Casella, *Inorg. Chem.*, 2004, **43**, 6805.
